# Supplementary material for: Enzymatic comparison and expression pattern of pig B4GALNT2 and B4GALNT2-like proteins
Source: publisher site journal article supplement (doi:10.1515/tjb-2023-0148), 2023-12-12
Supplement: Supplementary file 2 [file j_tjb-2023-0148_suppl_003.docx]

Table S1 The primary sequences used for PCR and real-time quantitative PCR

| Gene symbol | Forward primers | Reverse primers |
| --- | --- | --- |
| B4GALNT2-first pcr | GATTAAGGATGACTTCGTACA | TTATGGCCACACACTTAG |
| B4GALNT2-second pcr | CCTACGATCCATGACTTCGTACAGCCCTAG | GCGCCCTCGAGTTAGGTGACACATTGGAGAT |
| B4GALNT2Homologous recombinant primers | GACAAGGccatggctgatatcggatccATGACTTCGTACAGCCCTAG | gtggtggtgctcgagTTAGGTGACACATTGGAGATAGT |
| B4GALNT2-like-first pcr | CGACGGGATTAAGGATGACTT | CTAGGGCCACACATTCAG |
| B4GALNT2-like-second pcr | CCTACGATCCATGACTTCGTACAGCCCTAG | GCGCCCTCGAGTTAGGTGGCACATTGAAGAT |
| B4GALNT2-like-Homologous recombinant primers | gacaaggccatggctgatatcggatccATGACTTCGTACAGCCCTAG | gtggtggtgctcgag TTAGGTGACACATTGGAGATAGT |
